# Supplementary material
Source: PubMed Central journal article supplement (PMC8349178)

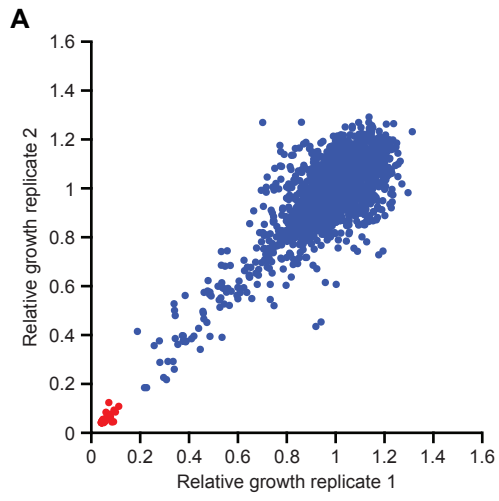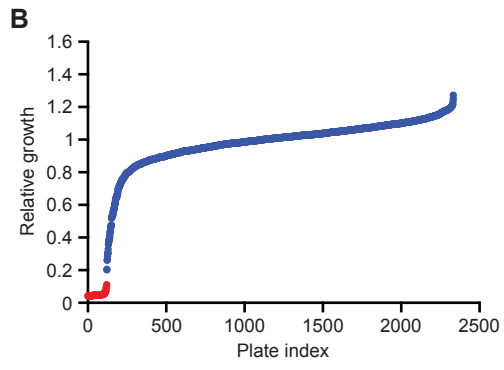

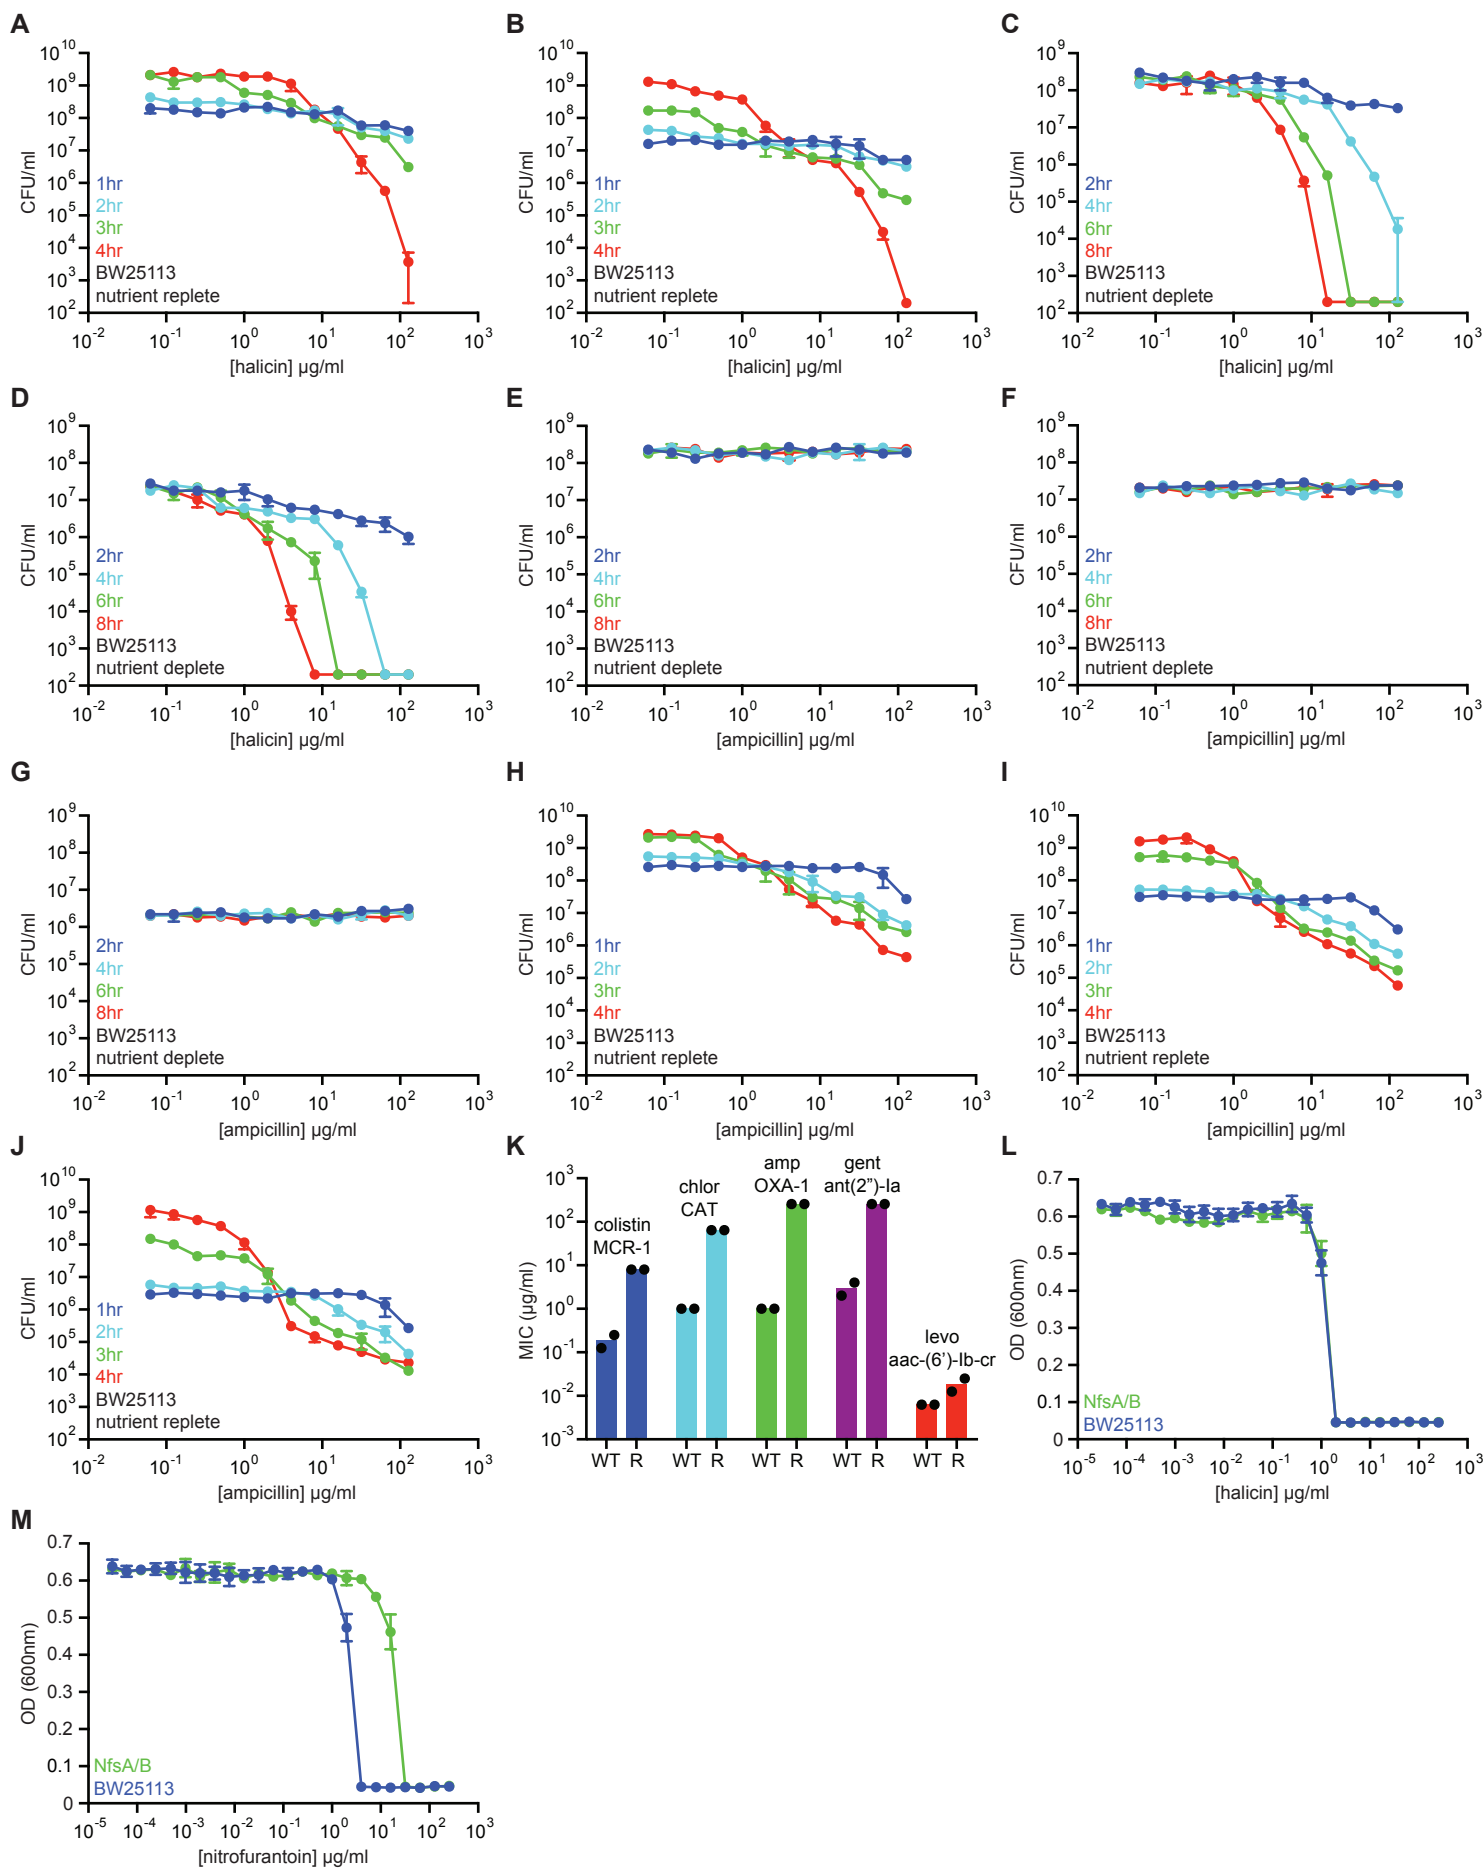

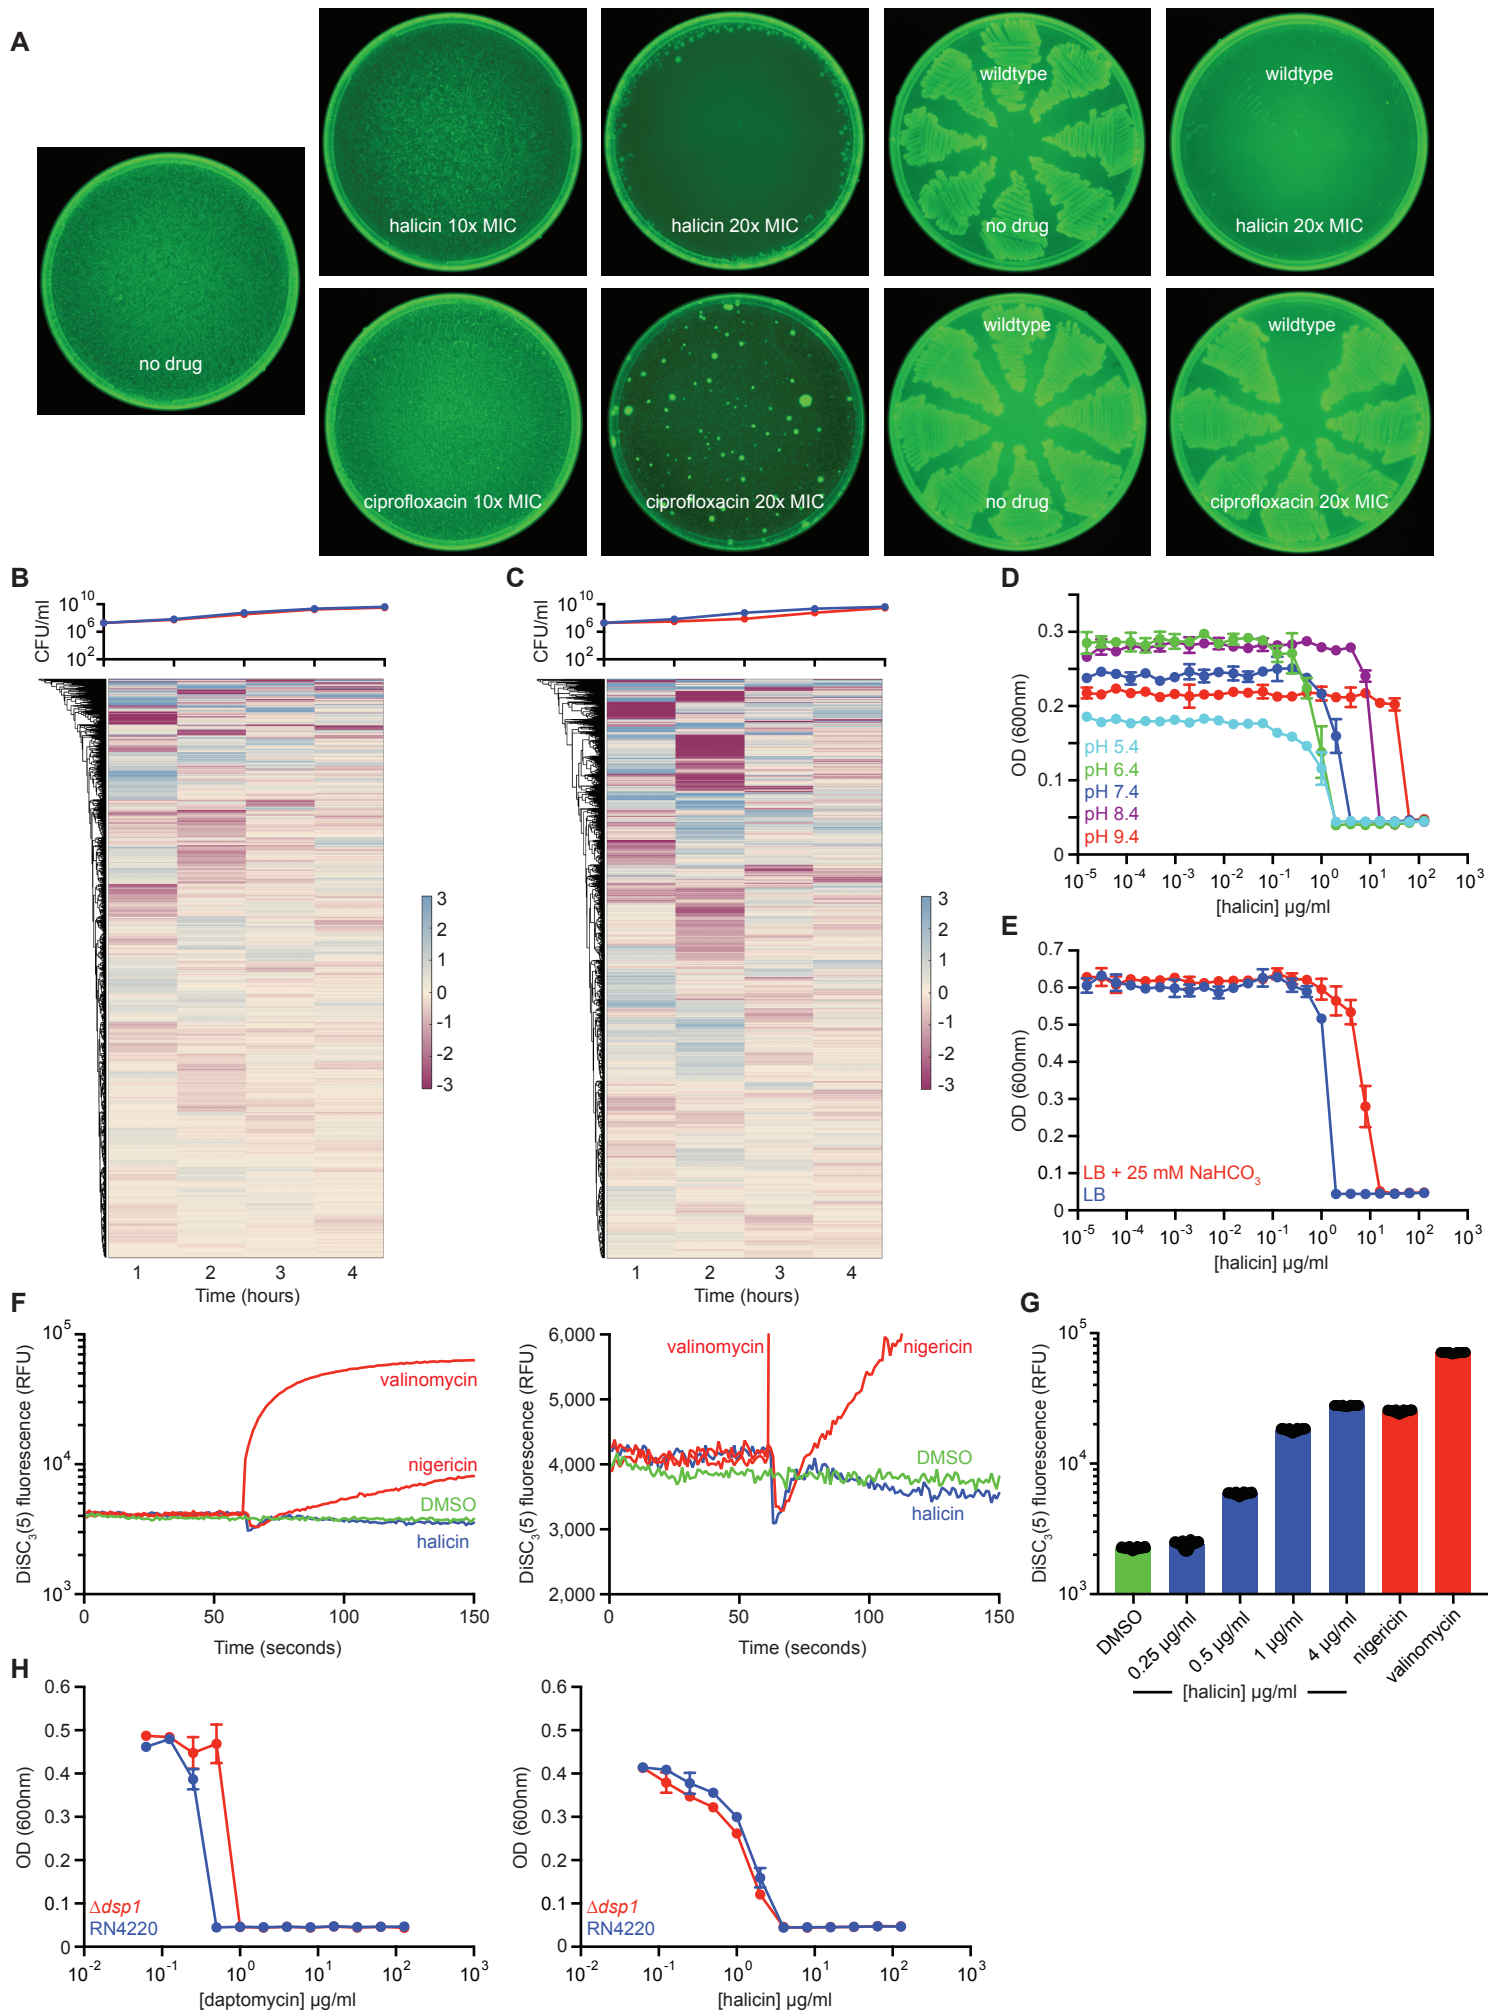

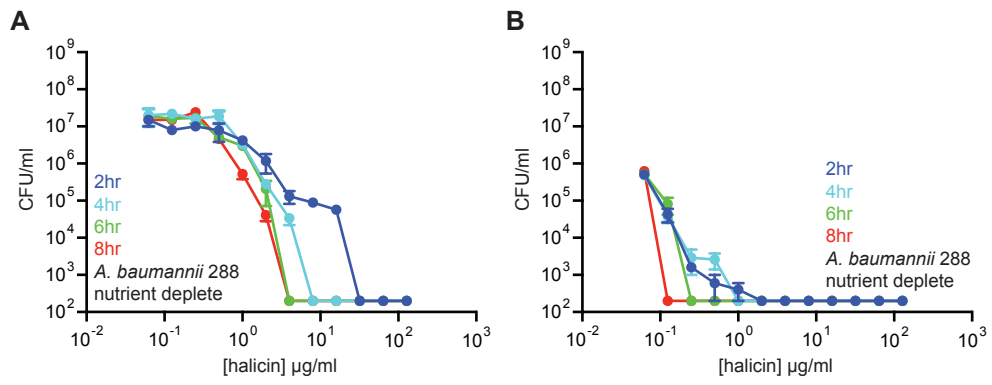



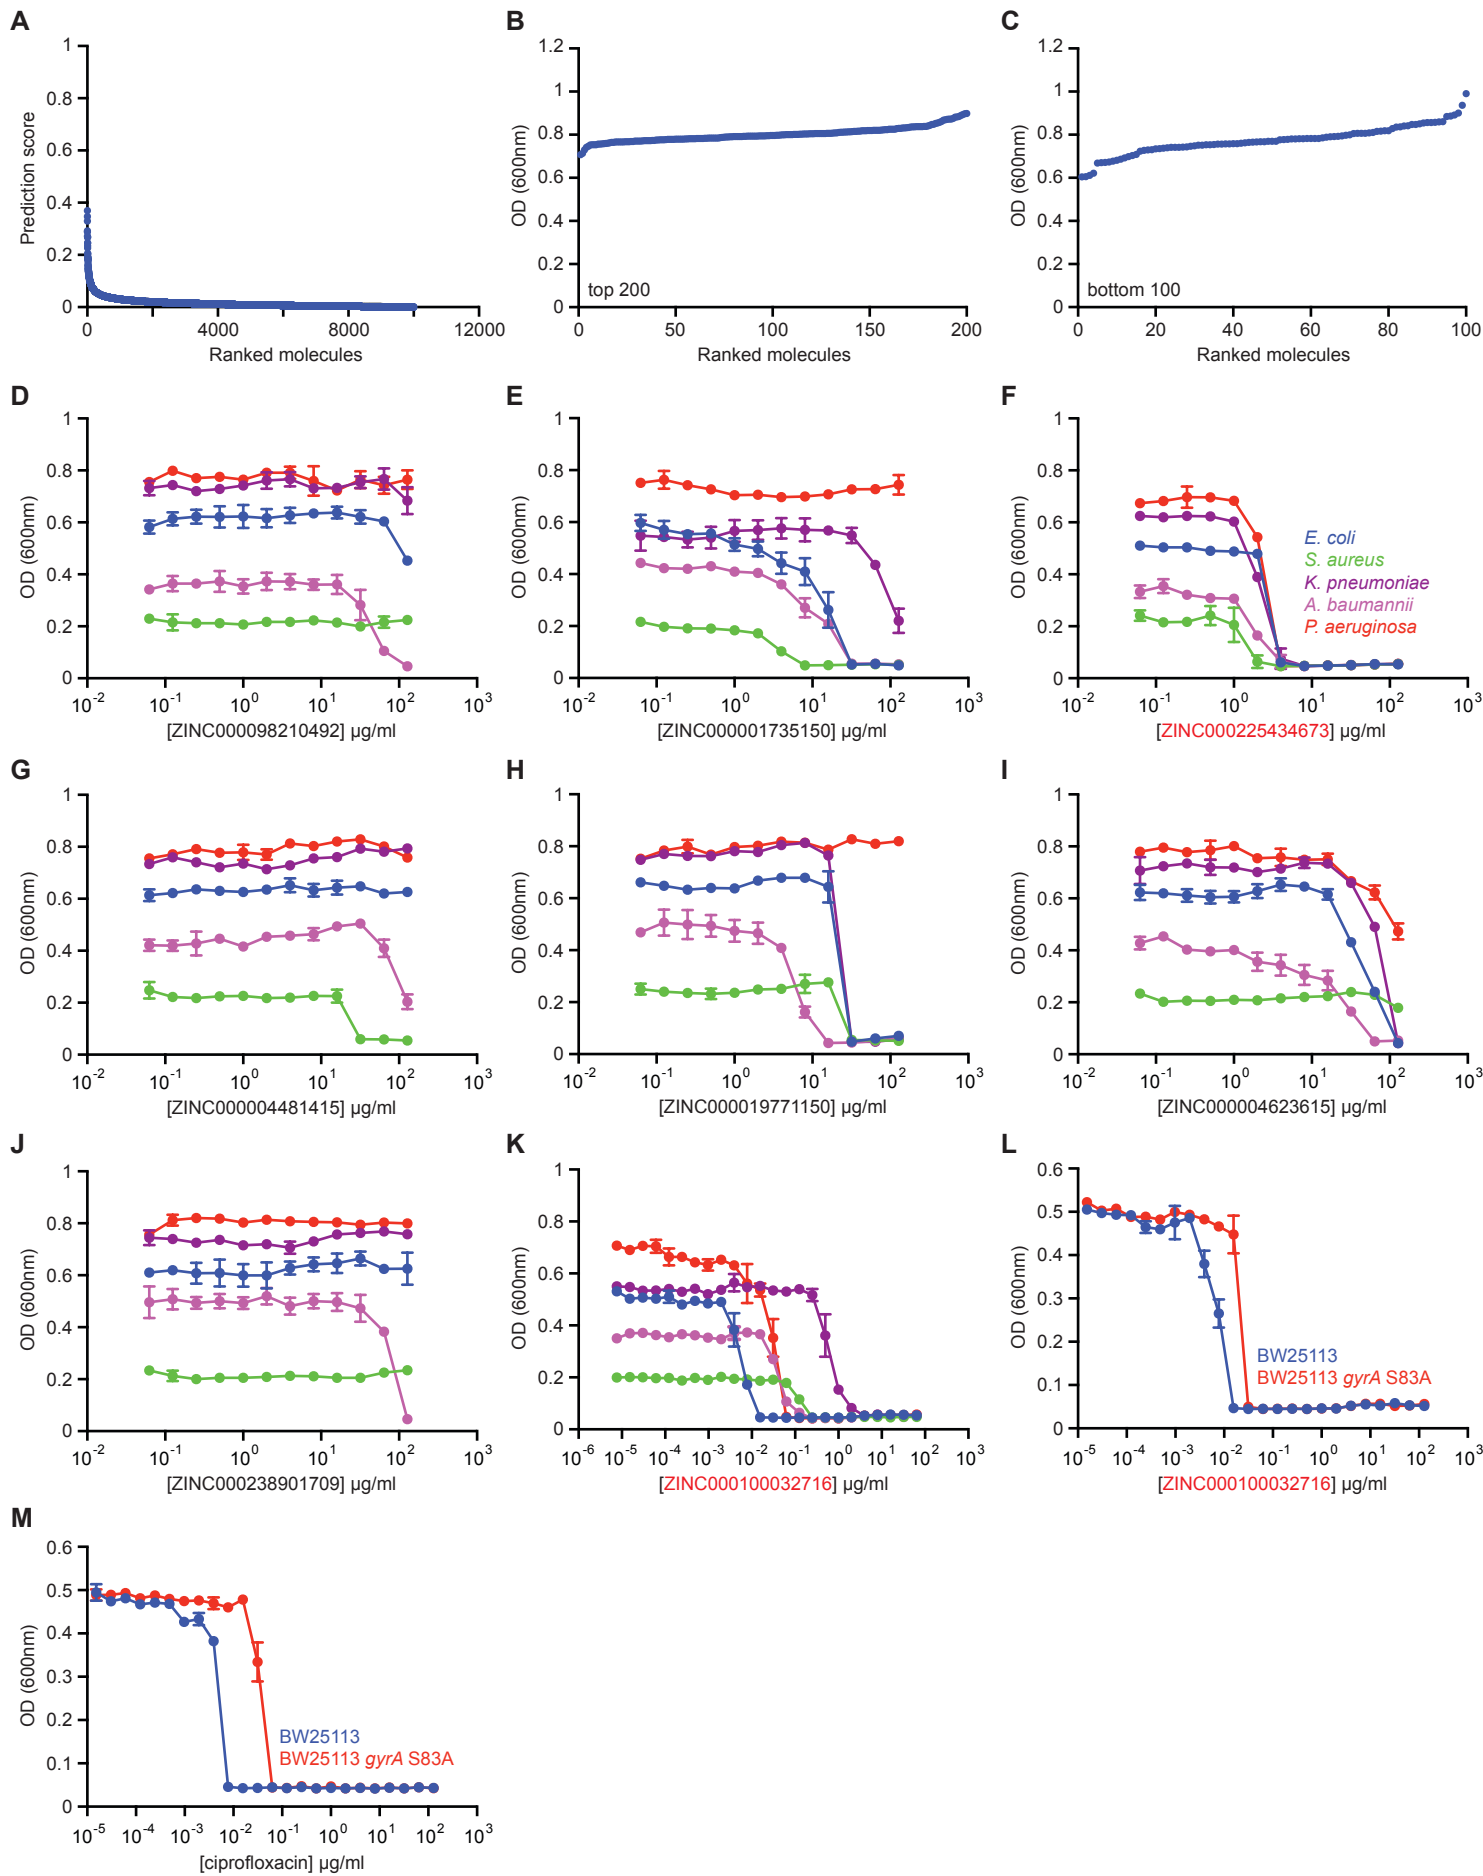

Supplement: NIHMS1723185-supplement-8.pdf [file NIHMS1723185-supplement-8.pdf]
